# Supplementary material for: Photo-Crosslinked Hyaluronic Acid/Carboxymethyl Cellulose Composite Hydrogel as a Dural Substitute to Prevent Post-Surgical Adhesion
Source: MDPI journal article supplement (doi:10.3390/ijms23116177), 2022-05-31
Supplement: s1 [file s1]

## Supplementary Materials

# Photo-Crosslinked Hyaluronic Acid/Carboxymethyl Cellulose Composite Hydrogel as a Dura Substitute to Prevent Post-Surgical Adhesion

### Nuclear magnetic resonance (NMR) analysis

For NMR analysis, HAMA and CMCMA was dissolved in D<sub>2</sub>O to obtain <sup>1</sup>H NMR spectra with Bruker Avance III HD 600 MHz NMR spectrometer (Billerica, MA, USA).

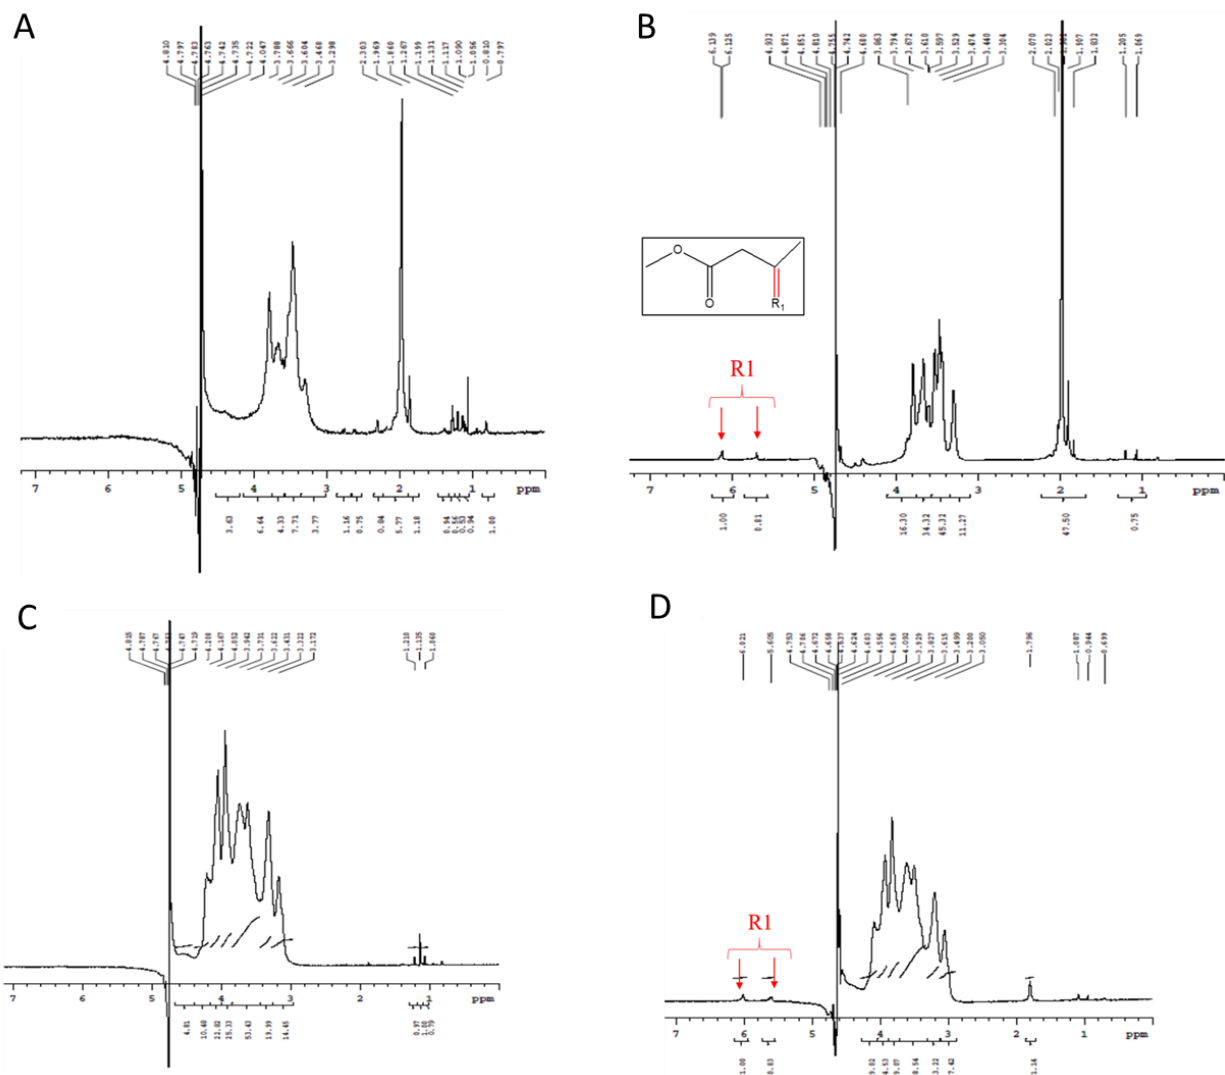

**Figure S1.** The  $^1\text{H}$  NMR spectra of hyaluronic acid (HA) (A), hyaluronic acid methacrylate (HAMA) (B), carboxymethyl cellulose (CMC) (C) and carboxymethyl cellulose methacrylate (CMCMA) (D). R1 indicates methacrylate groups.
